# Supplementary material for: Early predictors for mechanical ventilation in COVID-19 patients
Source: PubMed Central journal article supplement — Ther Adv Respir Dis. 2020 Oct 14;14:1753466620963017. doi: 10.1177/1753466620963017 (PMC7570781; doi:10.1177/1753466620963017), 2020-10-14
Supplement: Reviewer_2_v.1.pdf [file Reviewer_2_v.1.pdf]

Reviewer 2 v.1

Comments to the Author

The article is a retrospective study, which has tried to look at factors predicting mechanical ventilation. However, non invasive and invasive mechanical ventilation have been treated as one group, which may not represent same severity of disease.

Also, subjective markers like fatigue, may not be useful if included as predictors of severity or prognosis.

Severity scores like APACHE or SOFA or PF ratio are not available. Such established parameters shall be reported and compared between the two groups, to show whether the predictors that authors report perform better than the established ones.

Also, authors need to re-write the article to improve written English, in terms of grammar and syntax.
